# Supplementary material for: Enhanced soft magnetic properties and high-frequency stability of FeNiMo powder cores by coating SiO2 insulation layer
Source: Royal Society of Chemistry journal article supplement (doi:10.1039/d3ra01523h), 2023-01-01
Supplement: d3ra01523h1.pdf [file d3ra01523h1.pdf]

## Electronic supplementary information

### Enhanced soft magnetic properties and high-frequency stability of FeNiMo powder cores by coating SiO<sub>2</sub> insulation layer

Jinming Lai<sup>1, †</sup>, Likang Xiao<sup>2, †</sup>, Zhengwei Xiong<sup>3, \*</sup>, Leiming Fang<sup>4</sup>, Wenkun Zhu<sup>3</sup>, Fangguang Kuang<sup>5</sup>, Zhipeng Gao<sup>6, \*</sup>

<sup>1</sup> School of Microelectronics, Xidian University, Xi'an 710071; China Electronics Technology Group Corporation 29th Research Institute; Sichuan Broadband Microwave Circuit High Density Integration Engineering Research Center, Chengdu 610036, China

<sup>2</sup> School of Electronic Science and Engineering, University of Electronic Science and Technology of China; Southwest Institute of Applied Magnetism, Mianyang 621010, China

<sup>3</sup> Joint Laboratory for Extreme Conditions Matter Properties, School of Mathematics and Physics, Southwest University of Science and Technology; Sichuan Civil-military Integration Institute, Mianyang 621010, China

<sup>4</sup> Institute of Physics Nuclear and Chemistry, China Academy of Engineering Physics, Mianyang, 621900, China

<sup>5</sup> School of Physics and Electronic Information, Gannan Normal University, Ganzhou 341000, China

<sup>6</sup> Institute of Fluid Physics, China Academy of Engineering Physics, Mianyang 621900, China

\*Corresponding author:

Zhengwei Xiong (zw-xiong@swust.edu.cn) and Zhipeng Gao (z.p.gao@foxmail.com)

† These authors contributed equally to this work.

By laser particle size analyzer, the average sizes of FeNiMo/SiO<sub>2</sub> powder cores with different TEOS volume can be obtained, as shown in Fig. S1. Obviously, the particle sizes are increasing with the increase of TEOS concentrations. Compared with the pure FeNiMo particles (Fig. 1b), the thickness of the SiO<sub>2</sub> layer can be deduced in the range of 900 nm-4.7 μm.

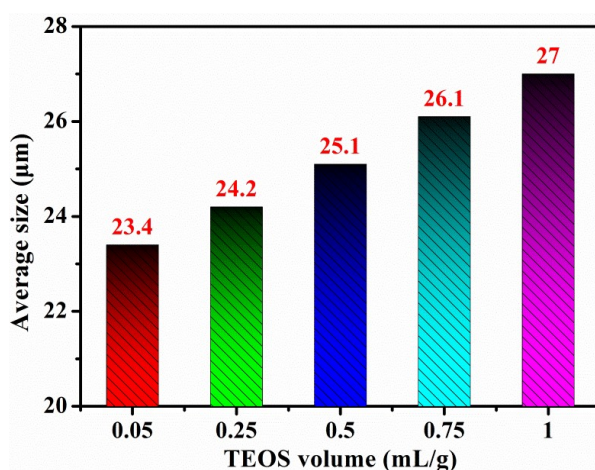

Fig. S1 Average sizes of FeNiMo/SiO<sub>2</sub> powder cores with different TEOS volume.

To confirm the core-shell structure, we further re-tested EDS elemental distribution mapping of FeNiMo/SiO<sub>2</sub> powders. According to select the incompletely coated particles (Fig. S2), we can clearly observe the formation of core-shell structures.

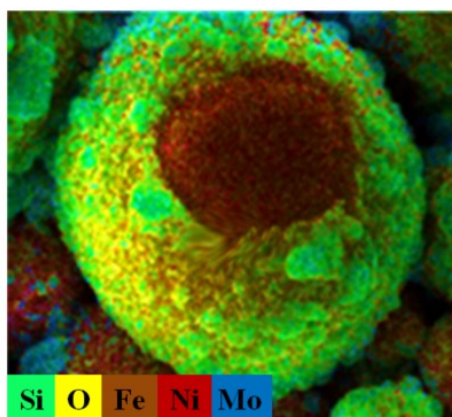

Fig. S2 EDS elemental distribution mapping of FeNiMo/SiO<sub>2</sub> powders.

Table S1. Elemental ratios of raw FeNiMo and FeNiMo/SiO<sub>2</sub> powders.

| Element | Raw FeNiMo powders |       | FeNiMo/SiO <sub>2</sub> powders |       |
|---------|--------------------|-------|---------------------------------|-------|
|         | wt.%               | at.%  | wt.%                            | at.%  |
| Fe K    | 12.29              | 11.57 | 10.64                           | 10.96 |
| Ni      | 85.14              | 84.27 | 73.74                           | 79.77 |
| Mo      | 2.57               | 4.16  | 2.23                            | 3.94  |
| Si K    | 0                  | 0     | 6.25                            | 3.24  |
| O K     | 0                  | 0     | 7.14                            | 2.10  |
| Total   | 100                |       | 100                             |       |

Table S2. Comparison of magnetic properties with domestic and foreign commercial molypermalloy powder (MPP) cores.

| Part Number | Company                                              | Country | $\mu_{ef}$ | $P_{cv}$                             | $P_{cv}$                              | Data Sources |
|-------------|------------------------------------------------------|---------|------------|--------------------------------------|---------------------------------------|--------------|
|             |                                                      |         |            | (kW/m <sup>3</sup> , 100 mT, 50 kHz) | (kW/m <sup>3</sup> , 100 mT, 100 kHz) |              |
| This work   | -                                                    | China   | 78         | 263.29                               | 633.44                                | -            |
| Y60-102     | Beijing Seven Star Flight Electron Co., Ltd          | China   | 60         | ~600                                 | -                                     | [1]          |
| KM050-060A  | ZHEJIANG NBTM KEDA MAGNETOELECTRICITY CO., LTD (KDM) | China   | 60         | 250                                  | -                                     | [2]          |
| C055041A2   | Magnetics                                            | USA     | 60         | -                                    | 700                                   | [3]          |
| CM102060G   | Chang Sung Corporation (CSC)                         | Korea   | 60         | 230                                  | -                                     | [4]          |

## References

- [1] <http://798.com.cn/products1.aspx?ProductsCateId=32&CateID=32&CurrCateID=15&CurrsupCateID=32>
- [2] <https://www.kda.com.cn/uploads/file/20211201/1638329222712889.pdf>
- [3] <https://www.mag-inc.com/Media/Magnetics/Datasheets/C055041A2.pdf>

[4]<http://www.changsung.com/file/product/cores/3.%20MPP%20Cores/TDS-CM102060G.pdf>
